# Supplementary material for: In Vivo Expression of NUP93 and Its Alteration by NUP93 Mutations Causing Focal Segmental Glomerulosclerosis
Source: PubMed Central journal article supplement — Kidney Int Rep. 2019 May 31;4(9):1312–22. doi: 10.1016/j.ekir.2019.05.1157 (PMC6732778; doi:10.1016/j.ekir.2019.05.1157), 2019-05-31
Supplement: mmc1.pdf [file mmc1.pdf]

## Supplementary Table 1

**Table S1.** The list of 53 genes which represent monogenic causes of human focal segmental glomerulosclerosis and /or steroid-resistant nephrotic syndrome.

| Gene           | protein                                                              | Mode of inheritance | Ref. |
|----------------|----------------------------------------------------------------------|---------------------|------|
| <i>ACTN4</i>   | Actinin, alpha 4                                                     | AD                  | [1]  |
| <i>ADCK4</i>   | AarF domain containing kinase 4                                      | AR                  | [2]  |
| <i>ALG1</i>    | ALG1 chitobiosyldiphosphodolichol Beta-Mannosyltransferase           | AR                  | [3]  |
| <i>ARHGDI1</i> | Rho GDP dissociation inhibitor (GDI) alpha                           | AR                  | [4]  |
| <i>ANLN</i>    | Actin-binding protein anillin                                        | AD                  | [5]  |
| <i>APOL1</i>   | Apolipoprotein L-1                                                   | unknown             | [6]  |
| <i>CD2AP</i>   | CD2 associated protein                                               | AR                  | [7]  |
| <i>COL4A3</i>  | Collagen type IV alpha 3 chain                                       | AR/AD               | [8]  |
| <i>COL4A4</i>  | Collagen type IV alpha 4 chain                                       | AR                  | [8]  |
| <i>COL4A5</i>  | Collagen type IV alpha 5 chain                                       | XL                  | [8]  |
| <i>COQ2</i>    | Coenzyme Q2 4-hydroxybenzoate polyprenyltransferase                  | AR                  | [9]  |
| <i>COQ6</i>    | Coenzyme Q6 monooxygenase                                            | AR                  | [10] |
| <i>CRB2</i>    | Crumbs, Drosophila, Homolog of 2                                     | AR                  | [11] |
| <i>CUBN</i>    | Cubilin                                                              | AR                  | [12] |
| <i>DGKE</i>    | Diacylglycerol kinase epsilon                                        | AR                  | [13] |
| <i>EMP2</i>    | Epithelial membrane protein 2                                        | AR                  | [14] |
| <i>FAT1</i>    | Fat tumor suppressor, drosophila, homolog of, 1                      | AR                  | [15] |
| <i>ITGA3</i>   | Integrin, alpha 3                                                    | AR                  | [16] |
| <i>ITGB4</i>   | Integrin, beta 4                                                     | AR                  | [17] |
| <i>KANK1</i>   | KN motif and ankyrin repeat domain-containing protein 1              | AR                  | [18] |
| <i>KANK2</i>   | KN motif and ankyrin repeat domain-containing protein 2              | AR                  | [18] |
| <i>KANK4</i>   | KN motif and ankyrin repeat domain-containing protein 4              | AR                  | [18] |
| <i>LAGE3</i>   | L antigen family member 3                                            | AR                  | [19] |
| <i>LAMB2</i>   | Laminin, beta 2                                                      | AR                  | [20] |
| <i>LCAT</i>    | Lecithin-Cholesterol Acyltransferase                                 | AR                  | [21] |
| <i>LMX1B</i>   | LIM Homeobox Transcription Factor 1 Beta                             | AD                  | [22] |
| <i>MAGI2</i>   | Membrane-associated guanylate kinase, WW and PDZ domainscontaining 2 | AR                  | [23] |
| <i>MYH9</i>    | Myoson heavy chain 9, nonmuscle                                      | AD                  | [24] |
| <i>MYO1E</i>   | Homo sapiens myosin IE                                               | AR                  | [25] |
| <i>NPHS1</i>   | Nephrin                                                              | AR                  | [26] |
| <i>NPHS2</i>   | Podocin                                                              | AR                  | [27] |
| <i>NUP107</i>  | Nucleoporin, 107-KD                                                  | AR                  | [28] |
| <i>NUP93</i>   | Nucleoporin 133-KD                                                   | AR                  | [29] |
| <i>NUP205</i>  | Nucleoporin, 205-KD                                                  | AR                  | [29] |
| <i>NUP85</i>   | Nucleoporin 85-KD                                                    | AR                  | [30] |
| <i>NUP133</i>  | Nucleoporin, 93-KD                                                   | AR                  | [30] |
| <i>NXF5</i>    | Nuclear RNA export factor 5                                          | XL                  | [31] |
| <i>OSGEP</i>   | O-sialoglycoprotein endopeptidase                                    | AR                  | [19] |
| <i>PDSS2</i>   | Prenyl (decaprenyl) diphosphate synthase, subunit 2                  | AR                  | [32] |

|                |                                                                                                |    |      |
|----------------|------------------------------------------------------------------------------------------------|----|------|
| <i>PLCE1</i>   | Phospholipase C, epsilon 1                                                                     | AR | [33] |
| <i>PTPRO</i>   | Protein tyrosine phosphatase, receptor type, O                                                 | AR | [34] |
| <i>SCARB2</i>  | Scavenger receptor class B, member 2                                                           | AR | [35] |
| <i>SGPL1</i>   | Sphingosine 1 phosphate lyase 1                                                                | AR | [36] |
| <i>SMARCA1</i> | SWI/SNF related, matrix associated, actin dependent regulator of chromatin, subfamily a-like 1 | AR | [37] |
| <i>TP53RK</i>  | TP53-regulating kinase                                                                         | AR | [19] |
| <i>TPRKB</i>   | TP53RK binding protein                                                                         | AR | [19] |
| <i>TRPC6</i>   | Transient receptor potential cation channel, subfamily C, member 6                             | AD | [38] |
| <i>WDR73</i>   | WD repeat-containing protein 73                                                                | AR | [39] |
| <i>WT1</i>     | Wilms Tumor 1                                                                                  | AD | [40] |
| <i>XPO5</i>    | Exportin 5                                                                                     | AR | [29] |

### Reference paper of each genes

- [1] Kaplan JM, Nat Genet. 2000, 24: 251-6.
- [2] Ashraf S, J Clin Invest. 2013, 123: 5179-89
- [3] Harshman LA, Pediatr Int. 2016, 58: 785-8
- [4] Gee HY, J Clin Invest. 2013, 123: 3243-53
- [5] Gbadegesin RA, J Am Soc Nephrol. 2014, 25: 1991-2002
- [6] Parsa A, N Engl J Med. 2013, 369: 2183-96
- [7] Wolf G, Lancet. 2003, 22: 1746-8
- [8] Gast C, Nephrol Dial Transplant. 2016, 31: 961-70
- [9] Diomedi-Camassei F, J Am Soc Nephrol. 2007, 18: 2773-80
- [10] Heeringa SF, J Clin Invest. 2011, 121: 2013-24
- [11] Ebarasi L, Am J Hum Genet. 2015, 96: 153-61
- [12] Ovunc B, J Am Soc Nephrol. 2011, 22: 1815-20
- [13] Lemaire M, Nat Genet. 2013, 45: 531-6
- [14] Gee HY, Am J Hum Genet. 2014, 94: 884-90
- [15] Gee HY, Nat Commun. Nat Commun. 2016, 7: 10822.
- [16] Yalcin EG, Hum Mol Genet. 2015, 24: 3679-88
- [17] Kambham N, Am J Kidney Dis. 2000, 36: 190-6.
- [18] Gee HY, J Clin Invest. 2015, 125: 2375-84
- [19] Braun DA, Nat Genet. 2017, 49: 1529-1538
- [20] Zenker M, Hum Mol Genet. 2004, 13: 2625-32
- [21] Downie ML Paediatr Int Child Health. 2017, 37: 248-258
- [22] Dreyer SD, Nat Genet 1998, 19: 47-50
- [23] Bierzynska A, J Am Soc Nephrol. 2017, 28: 1614-1621
- [24] Heath KE, Am J Hum Genet. 2001, 69: 1033-45
- [25] Mele C, N Engl J Med. 2011, 365: 295-306
- [26] Kestilä M, Mol Cell. 1998, 1: 575-82.
- [27] Boute N, Nat Genet. 2000, 24: 349-54.
- [28] Miyake N, Am J Hum Genet. 2015, 97: 555-66
- [29] Braun DA, Nat Genet. 2016, 48: 457-65
- [30] Braun DA, J Clin Invest. 2018, 128: 4313-4328
- [31] Esposito T, Hum Mol Genet. 2013, 22: 3654-66
- [32] López LC, Am J Hum Genet. 2006, 79: 1125-9
- [33] Hinkes B, Nat Genet. 2006, 38: 1397-405
- [34] Ozaltin F, Am J Hum Genet. 2011, 89: 139-47

- [35] Balreira A, Hum. Molec. Genet. 2008, 17: 2238-2243
- [36] Lovric S, J Clin Invest. 2017, 127: 912-928
- [37] Boerkoel CF, Nat Genet. 2002, 30: 215-20
- [38] Winn MP, Science. 2005, 308: 1801-4
- [39] Colin E, Am J Hum Genet. 2014, 95: 637-48
- [40] Lipska BS, Kidney Int. 2014, 85: 1169-78

**Supplementary Table 2**

**Table S2. Variant frequencies of the *NUP93* variants (Data from gnomAD\*)**

| population            | c.1573C>T    |               |                       |                  | c.1886A>G    |               |                       |                  |
|-----------------------|--------------|---------------|-----------------------|------------------|--------------|---------------|-----------------------|------------------|
|                       | Allele count | Allele number | Number of Homozygotes | Allele frequency | Allele count | Allele number | Number of Homozygotes | Allele frequency |
| European (non-Finish) | 1            | 111474        | 0                     | 0.000008971      | 1            | 111406        | 0                     | 0.000008976      |
| European (Finish)     | 0            | 22260         | 0                     | 0.000            | 0            | 22264         | 0                     | 0.000            |
| Latino                | 1            | 33576         | 0                     | 0.00002978       | 0            | 33408         | 0                     | 0.000            |
| Ashkenazi Jewish      | 0            | 9842          | 0                     | 0.000            | 0            | 9824          | 0                     | 0.000            |
| African               | 0            | 15266         | 0                     | 0.0000           | 0            | 15298         | 0                     | 0.000            |
| South Asian           | 0            | 30782         | 0                     | 0.000            | 0            | 30580         | 0                     | 0.000            |
| East Asian            | 0            | 17224         | 0                     | 0.000            | 0            | 17220         | 0                     | 0.000            |
| Other                 | 0            | 5472          | 0                     | 0.000            | 0            | 5472          | 0                     | 0.000            |
| total                 | 2            | 245916        | 0                     | 0.000008133      | 1            | 245472        | 0                     | 0.000004074      |

\*gnomAD, Genome Aggregation Database <sup>31</sup>

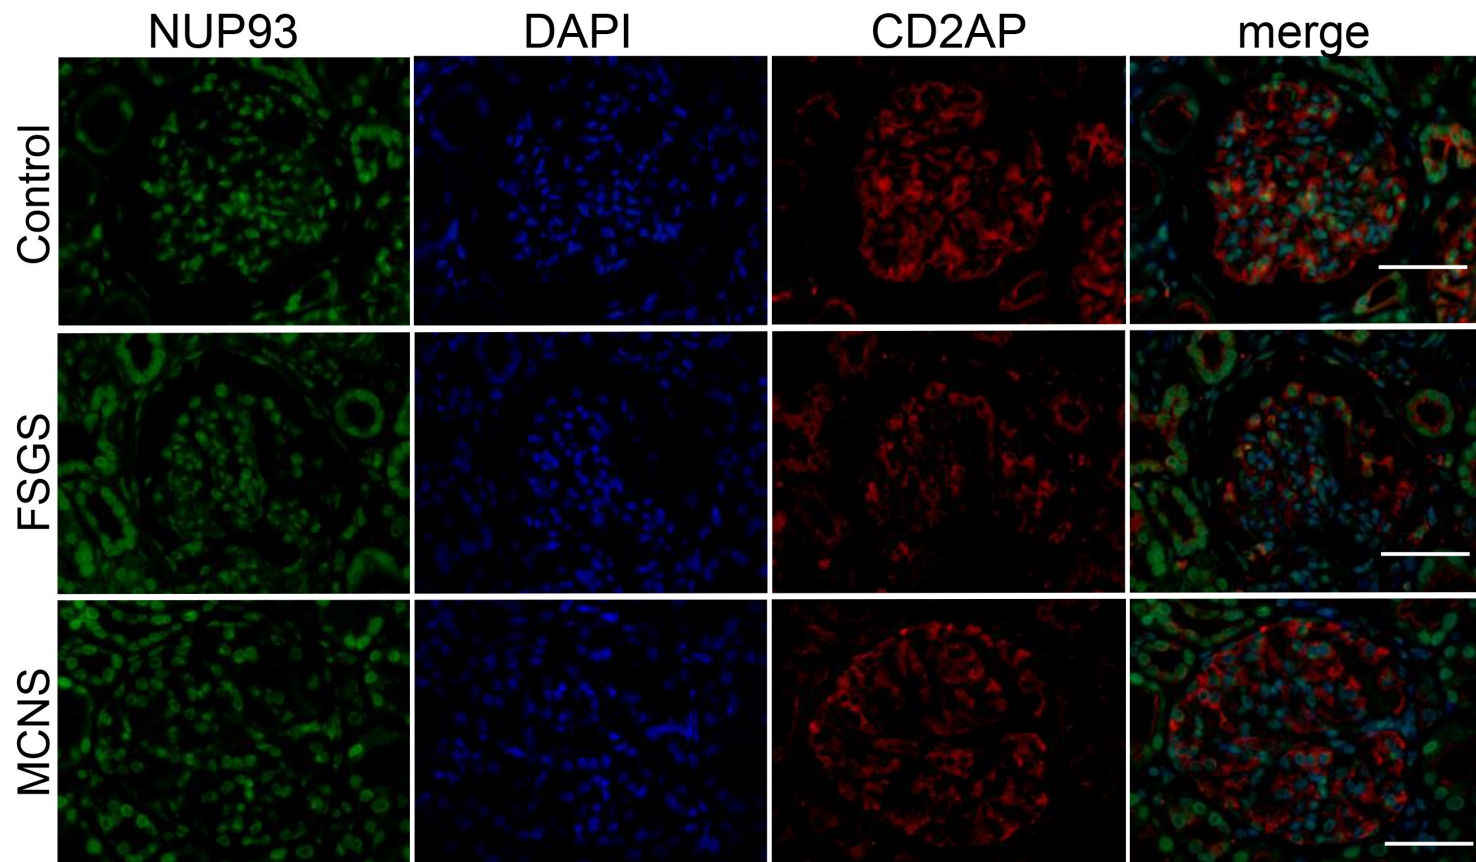

Supplementary data, Figure S1
